# Supplementary material
Source: PubMed Central journal article supplement (PMC2761102)
Supplement: NIHMS130377-supplement-1.pdf [file NIHMS130377-supplement-1.pdf]

**A**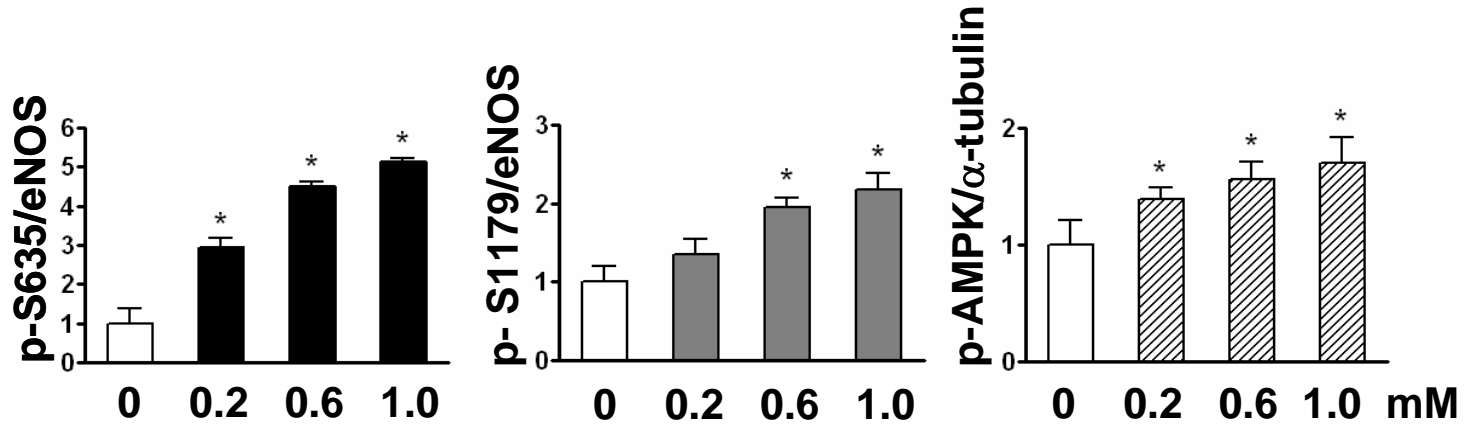**B**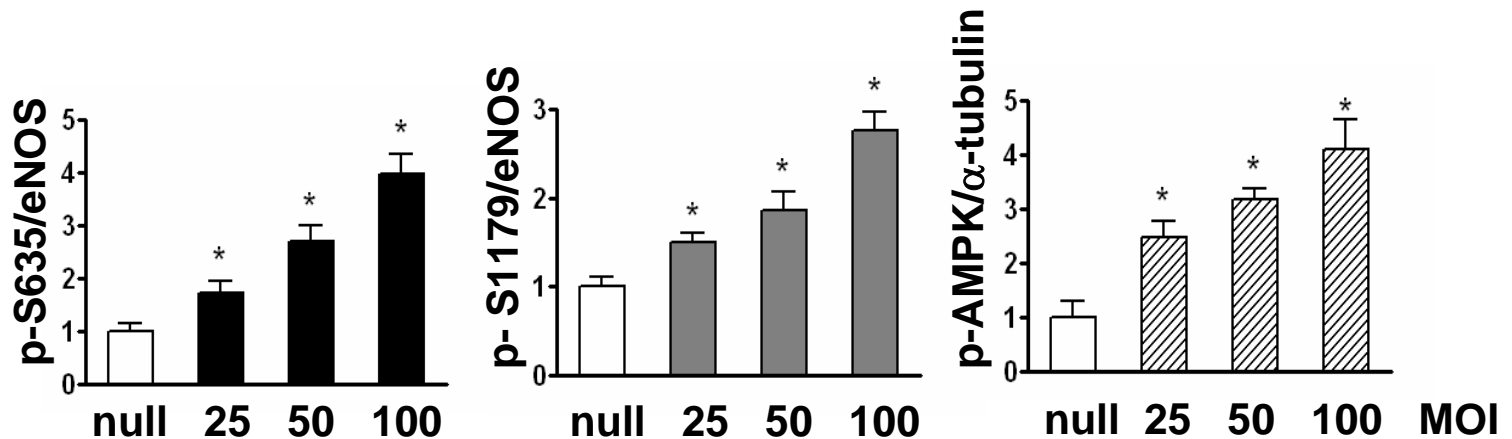

**Online Figure I.** Densitometry analyses of the ratios of phospho-eNOS Ser-635 or Ser-1179 to total eNOS and phospho-AMPK Thr-172 to  $\alpha$ -tubulin examined by Western blotting in BAECs treated with various concentrations of AICAR for 15 min (A) or infected with Ad-AMPK-CA at different MOI for 24 h (B). The control cells were infected with Ad-null virus at 50 MOI. \* $p$ <0.05 between treated groups and non-treated controls.

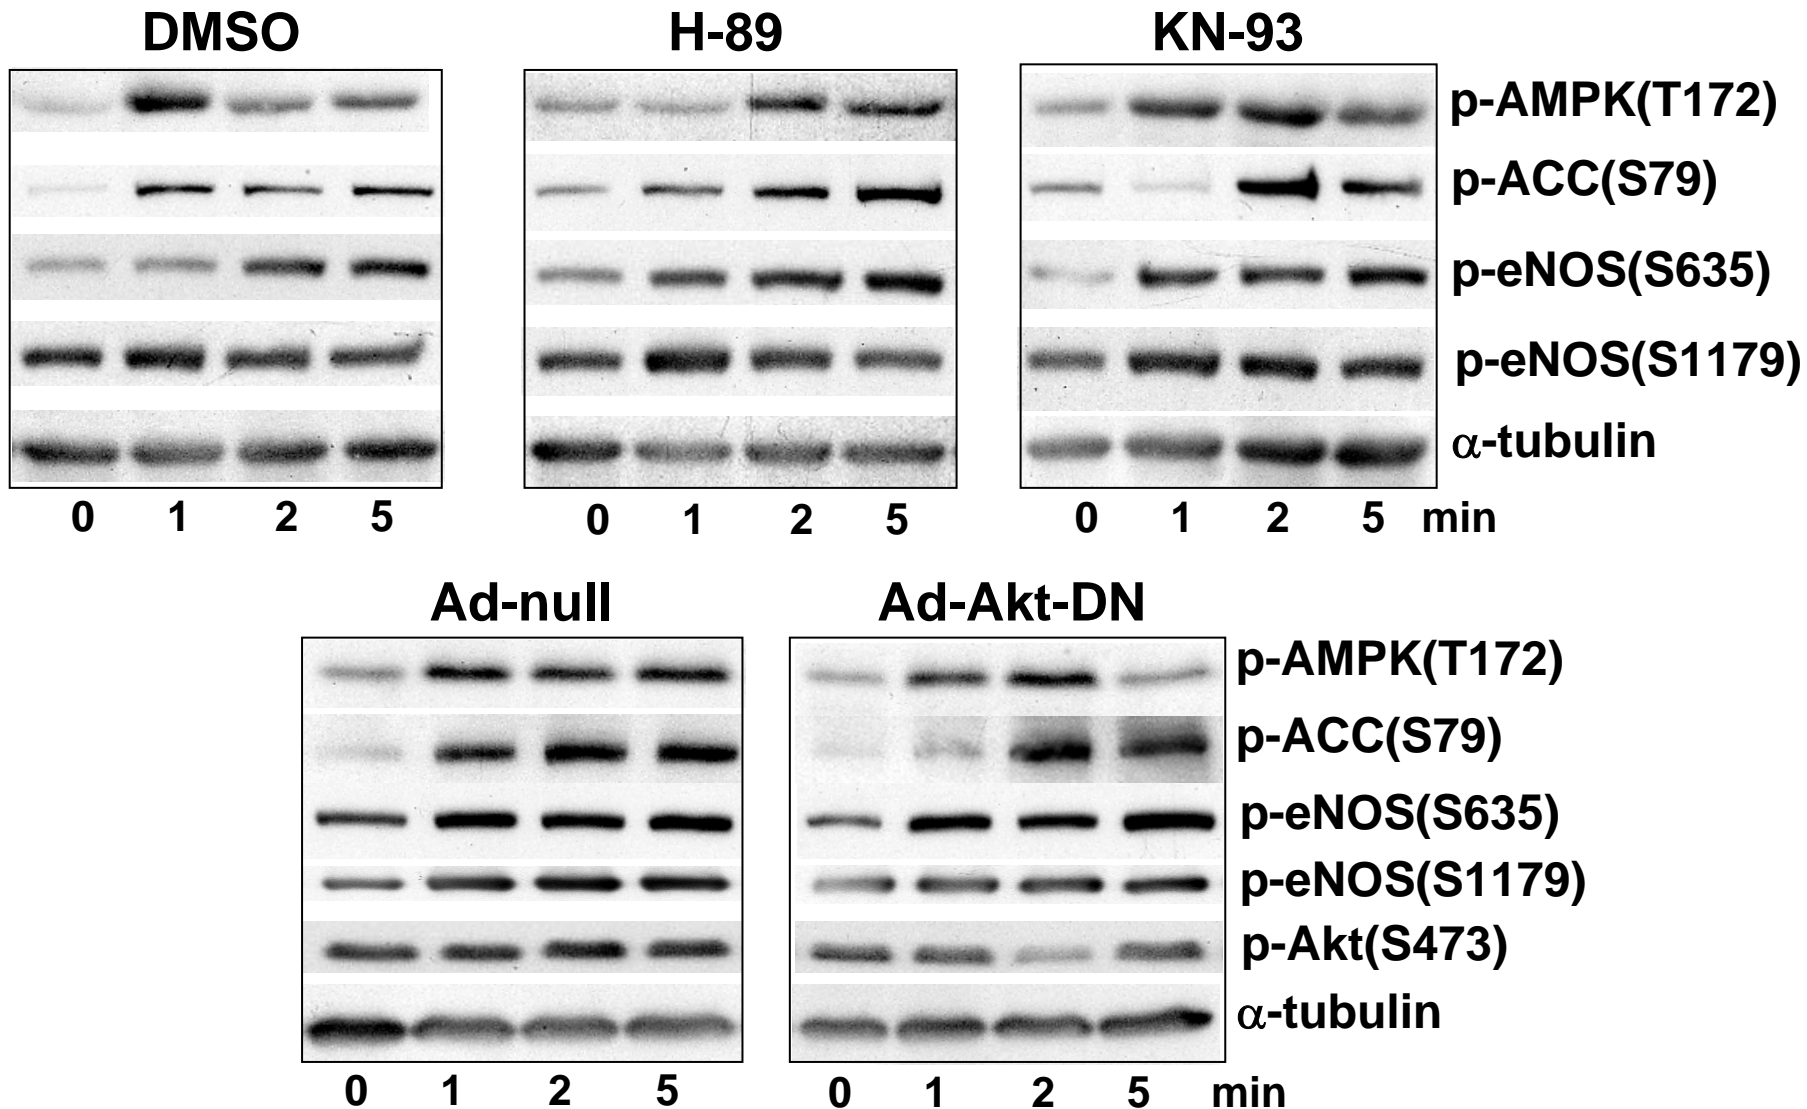

**Online Figure II.** BAECs were treated with H-89 (50 nM) or KN-93 (1  $\mu$ M) for 30 min or infected with Ad-null control virus (50 MOI) or Ad-Akt-DN (50 MOI) expressing a dominant mutant of Akt. The cells were then subjected to a laminar shear stress at 12 dyn/cm<sup>2</sup> for 1, 2, and 5 min. The collected cell lysates were analyzed by Western Blot with various antibodies as indicated.

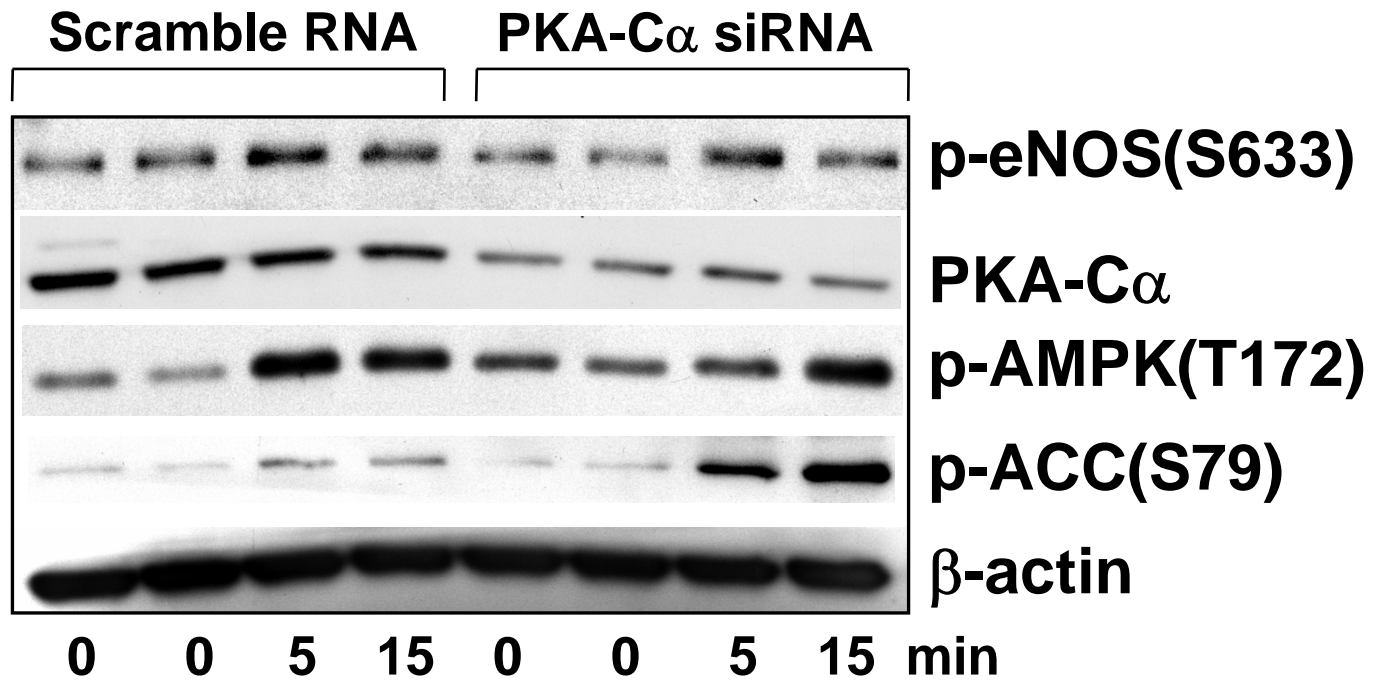

**Online Figure III.** HUVECs were transfected with scramble or PKA-C $\alpha$  siRNA (10 nM) against the  $\alpha$  isoform of the catalytic unit of PKA. Forty eight hours after transfection, the cells were subjected to laminar shear stress (12 dyne/cm<sup>2</sup>) for 5 or 15 min. Cells kept under static condition were used as control (time 0). Cell lysates were resolved by SDS-PAGE and blotted with various antibodies as indicated.

**Online Table I. The sequence, mass, and m/z for the phosphorylation of SAMS, S633, and S1177 peptides**

| Peptide | Sequence                              | Monoisotopic mass |                | Charge state | m/z <sup>B</sup> |
|---------|---------------------------------------|-------------------|----------------|--------------|------------------|
|         |                                       | nonphosphorylated | phosphorylated |              |                  |
| SAMS    | HMRSAM <u>S</u> GLHLVKRR <sup>A</sup> | 1777.97           | 1857.93        | 4+           | 465.49           |
| S633    | PLVSSWRRKRK <u>E</u> SSNTDSA          | 2203.15           | 2283.11        | 4+           | 571.79           |
| S1177   | RTQEVTSRIR <u>TQ</u> SFSLQER          | 2321.22           | 2401.19        | 3+           | 801.40           |

<sup>A</sup> the putative Ser phosphorylation sites

<sup>B</sup> m/z, 3+ (801.40) represents phosphorylated S1177 whereas m/z 4+ (465.49 and 571.79) are those for phosphorylated SAMS and S633.
